# Supplementary material for: Selective growth of TiO2 beads on Ag nanowires and their photocatalytic performance
Source: Royal Society of Chemistry journal article supplement (doi:10.1039/c5ce00705d), 2015-01-01
Supplement: c5ce00705d1.pdf [file c5ce00705d1.pdf]

## Supporting Information

# Selective Growth of TiO<sub>2</sub> Beads on Ag Nanowires and Their Photocatalytic Performance

Changchao Jia,<sup>a</sup> Hsueh-Shih Chen<sup>b</sup> and Ping Yang<sup>\*a</sup>

<sup>a</sup>School of Material Science and Engineering, University of Jinan, Jinan, 250022, P.R. China.

Fax: +86 531 87974453; Tel: +86 531 89736225

E-mail: mse\_yangp@ujn.edu.cn

<sup>b</sup>Department of Materials Science and Engineering, National Tsing Hua University, Hsinchu 300, Taiwan.

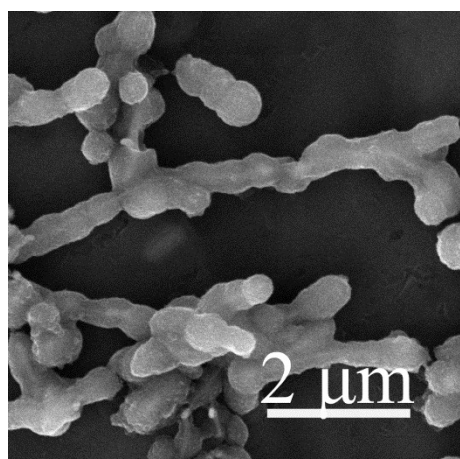

Figure S1. SEM image of Ag NW@TiO<sub>2</sub> heterostructures (sample 4) prepared with 0.15 mL amount of TBT.

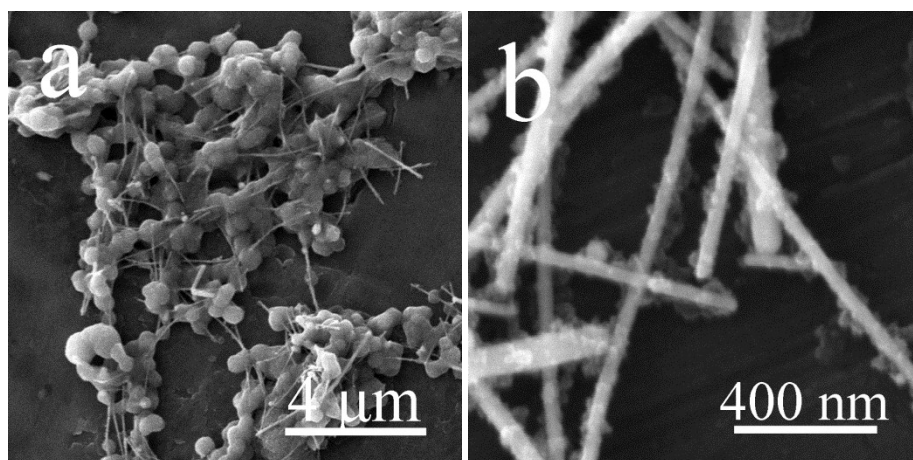

Figure S2. SEM images (a-b) of Ag NW@TiO<sub>2</sub> sample (sample 7) prepared in the absence of TGA.

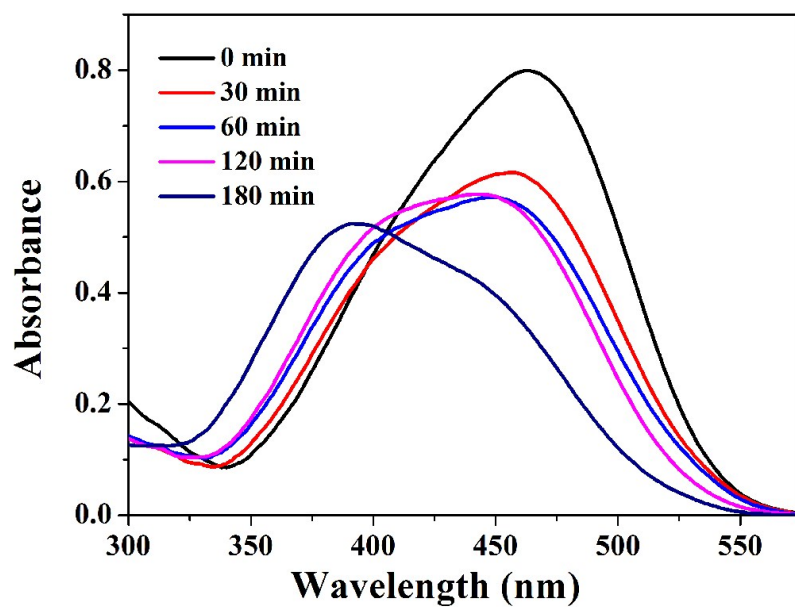

Figure S3. Photocatalytic degradation profile of MO under visible-light irradiation. (0 min indicates suspension stirred for 30 min in the dark before irradiation)
